# Supplementary material
Source: PubMed Central journal article supplement (PMC6248359)
Supplement: bgy043_suppl_supplementary_material.pdf [file bgy043_suppl_supplementary_material.pdf]

Supplementary information for

**DNA Methylome and Transcriptome Alterations and Cancer Prevention by  
Curcumin in Colitis-accelerated Colon Cancer in Mice**

Yue Guo, Renyi Wu, John M. Gaspar, Davit Sargsyan, Zheng-Yuan Su, Chengyue Zhang, Linbo Gao, David Cheng, Wenji Li, Chao Wang, Ran Yin, Mingzhu Fang, Michael P. Verzi, Ronald P. Hart, and Ah-Ng Kong\*

\*Ernest Mario School of Pharmacy, Room 228, Rutgers University

160 Frelinghuysen Road, Piscataway, NJ 08854

E-mail: kongt@pharmacy.rutgers.edu

|                 |   |
|-----------------|---|
| Table S1 .....  | 2 |
| Table S2 .....  | 3 |
| Table S3 .....  | 4 |
| Table S4 .....  | 5 |
| Figure S1 ..... | 6 |
| Figure S2 ..... | 7 |
| Figure S3 ..... | 8 |
| Figure S4 ..... | 9 |

**Table S1.** Genes and primers for qPCR validation (5' – 3').

| <b>Gene</b> | <b>Forward</b>          | <b>Reverse</b>          |
|-------------|-------------------------|-------------------------|
| GAPDH       | AACAGCAACTCCCACTCTTC    | CCTGTTGCTGTAGCCGTATT    |
| Itgb2       | GTGGTAGGTGTCGTA CTGATTG | GGGACTTGAGTTTCTCCTTCTC  |
| Lgals9      | GAGTGAGGAAGAGAGCATTGG   | CTCCTTGGATTGGTCCAGTAAA  |
| Igfbp4      | CTGCAGGAGAGAGGAAAGAATG  | GGTGGGCAACTAGAAAGATAGAG |
| Duoxa2      | ATGTCCATGCCTTGGAGAAG    | CCAGGTGATATTGGTGGTACAG  |
| PF4         | GGGCAGGCAGTGAAGATAAA    | GCCACTGGACCCAAAGATAA    |
| Icam1       | CCAGTACTGCTGGTCATTGT    | TCCTCCTGAGCCTTCTGTAA    |
| Gjal        | GGTGTCTCTCGCTCTGAATATC  | GTAAGGATCGCTTCTTCCCTTC  |
| Tnf         | TTGTCTACTCCAGGTTCTCT    | GAGGTTGACTTTCTCCTGGTATG |
| Nt5e        | CTGGAACAGAGTGGTCCAATTA  | GCTTGGGAGGGTCACTTTATAC  |

**Table S2.** Primers used in pyrosequencing and vector construction (5' – 3').

---

|                   |                                  |
|-------------------|----------------------------------|
| <b>Amplicon A</b> |                                  |
| Forward           | ATGGAGAAGAAATYGAGATAGAGGTGTAGG   |
| Reverse           | TCCCTCCTAACTAATCCCTTACTAT-biotin |
| Sequencing        | ATAGAGGTGTAGGGT                  |

---

|                   |                              |
|-------------------|------------------------------|
| <b>Amplicon B</b> |                              |
| Forward           | GAGAGTGTGGAGGGGATAGAGTT      |
| Reverse           | CCCCTTCATCTTCCTCCTTAT-biotin |
| Sequencing        | GGGGATAGAGTTAGGAT            |

---

|                                         |                               |
|-----------------------------------------|-------------------------------|
| <b>Amplicon B (Vector construction)</b> |                               |
| Forward                                 | AGTCAAGCTTCGGGGTGATCGGTCC     |
| Reverse                                 | TGACCCATGGAAGTATGAGAGGGAGGCCA |

---

**Table S3.** Regulated pathways from Ingenuity Pathway analysis with RNA-seq data.

| Ingenuity Canonical Pathways                                          | AOM+DSS<br>vs Control |                       | AOM+DSS+Cur.<br>vs AOM+DSS |                       |
|-----------------------------------------------------------------------|-----------------------|-----------------------|----------------------------|-----------------------|
|                                                                       | -log<br>(p-value)     | activation<br>z score | -log<br>(p-value)          | activation<br>z score |
| PKC Signaling in T Lymphocytes                                        | 6.8                   | 1.512                 | 4.41                       | -4.146                |
| iCOS-iCOSL Signaling in T Helper Cells                                | 6.45                  | 1.46                  | 4.04                       | -3.357                |
| Aldosterone Signaling in Epithelial Cells                             | 6.06                  | -2.524                | 2.54                       | -0.632                |
| PI3K Signaling in B Lymphocytes                                       | 6.01                  | 1.877                 | 5.13                       | -3.273                |
| Leukocyte Extravasation Signaling                                     | 5.47                  | 1.257                 | 2.41                       | -3.962                |
| NRF2-mediated Oxidative Stress Response                               | 5.47                  | 0.832                 | 6.11                       | -0.243                |
| Role of NFAT in Regulation of the Immune Response                     | 5.45                  | 1.826                 | 3.59                       | -4.707                |
| Mitotic Roles of Polo-Like Kinase                                     | 4.59                  | 1.941                 | 3.52                       | -1.265                |
| IGF-1 Signaling                                                       | 4.38                  | -0.728                | 2.29                       | -1.897                |
| p70S6K Signaling                                                      | 4.34                  | -0.426                | 2.41                       | -2.183                |
| Production of Nitric Oxide and Reactive Oxygen Species in Macrophages | 4.24                  | 1.257                 | 2.32                       | -3.266                |
| LPS/IL-1 Mediated Inhibition of RXR Function                          | 4.16                  | 0.775                 | 6.81                       | -2.84                 |
| Th1 Pathway                                                           | 4.12                  | 1.279                 | 5.19                       | -3.128                |
| IL-6 Signaling                                                        | 4.1                   | -0.426                | 2.21                       | -2                    |
| Calcium-induced T Lymphocyte Apoptosis                                | 4                     | 1.807                 | 6.01                       | -3.153                |
| ERK/MAPK Signaling                                                    | 3.62                  | -0.186                | 2.44                       | -2.6                  |
| Dendritic Cell Maturation                                             | 3.61                  | 2.268                 | 3.05                       | -4.2                  |
| Estrogen-Dependent Breast Cancer Signaling                            | 3.22                  | 0.535                 | 2.37                       | -3                    |
| Cdc42 Signaling                                                       | 3.07                  | 2.673                 | 5.25                       | -2.183                |
| Actin Cytoskeleton Signaling                                          | 2.36                  | 0.408                 | 2.48                       | -3.4                  |

**Table S4.** Regulated pathways from Ingenuity Pathway analysis with methyl-seq data.

| Ingenuity Canonical Pathways                        | AOM+DSS<br>vs Control |                       | AOM+DSS+Cur.<br>vs AOM+DSS |                       |
|-----------------------------------------------------|-----------------------|-----------------------|----------------------------|-----------------------|
|                                                     | -log<br>(p-value)     | activation<br>z score | -log<br>(p-value)          | activation<br>z score |
| Role of NFAT in Regulation of the Immune Response   | 5.26                  | 2.6                   | 3.15                       | -1.886                |
| Angiopoietin Signaling                              | 4.7                   | 0.333                 | 2.03                       | -0.816                |
| Tec Kinase Signaling                                | 4.52                  | 2.041                 | 2.76                       | -3                    |
| Neuropathic Pain Signaling in Dorsal Horn Neurons   | 4.44                  | 1.091                 | 2.44                       | -1.604                |
| Gαq Signaling                                       | 4.37                  | 2.041                 | 2.56                       | -1.698                |
| Dendritic Cell Maturation                           | 4.33                  | 2.887                 | 3.42                       | -1.528                |
| Type II Diabetes Mellitus Signaling                 | 4.19                  | 1.606                 | 2.02                       | -0.905                |
| IL-8 Signaling                                      | 4.18                  | 1.512                 | 2.06                       | -1.147                |
| CD40 Signaling                                      | 4.05                  | 2                     | 2.45                       | -2.714                |
| Mouse Embryonic Stem Cell Pluripotency              | 3.91                  | 0.229                 | 2.74                       | 0.535                 |
| Lymphotoxin β Receptor Signaling                    | 3.78                  | 1.732                 | 2.01                       | -1.414                |
| FcγRIIB Signaling in B Lymphocytes                  | 3.6                   | 1.155                 | 2.09                       | -1.414                |
| Renin-Angiotensin Signaling                         | 3.58                  | 1.147                 | 2.2                        | -1.604                |
| Fc Epsilon RI Signaling                             | 3.38                  | 1.5                   | 4.25                       | -1.291                |
| Glioma Signaling                                    | 3.14                  | 1                     | 2.1                        | -0.905                |
| LPS-stimulated MAPK Signaling                       | 3.09                  | 1.291                 | 2.17                       | -0.905                |
| Colorectal Cancer Metastasis Signaling              | 2.99                  | 0.539                 | 2.36                       | -1.225                |
| Nitric Oxide Signaling in the Cardiovascular System | 2.8                   | 1.213                 | 2.16                       | -1.155                |
| B Cell Activating Factor Signaling                  | 2.73                  | 1.633                 | 2.81                       | -0.816                |
| Estrogen-Dependent Breast Cancer Signaling          | 2.63                  | 0.905                 | 2.06                       | -0.707                |
| Melanocyte Development and Pigmentation Signaling   | 2.59                  | 0.775                 | 2.68                       | -1.387                |
| B Cell Receptor Signaling                           | 2.43                  | 1.46                  | 2.68                       | -0.894                |
| TNFR2 Signaling                                     | 2.39                  | 1.342                 | 2.28                       | 0                     |
| CXCR4 Signaling                                     | 2.31                  | 1.147                 | 3.22                       | -1.698                |

**Figure S1**

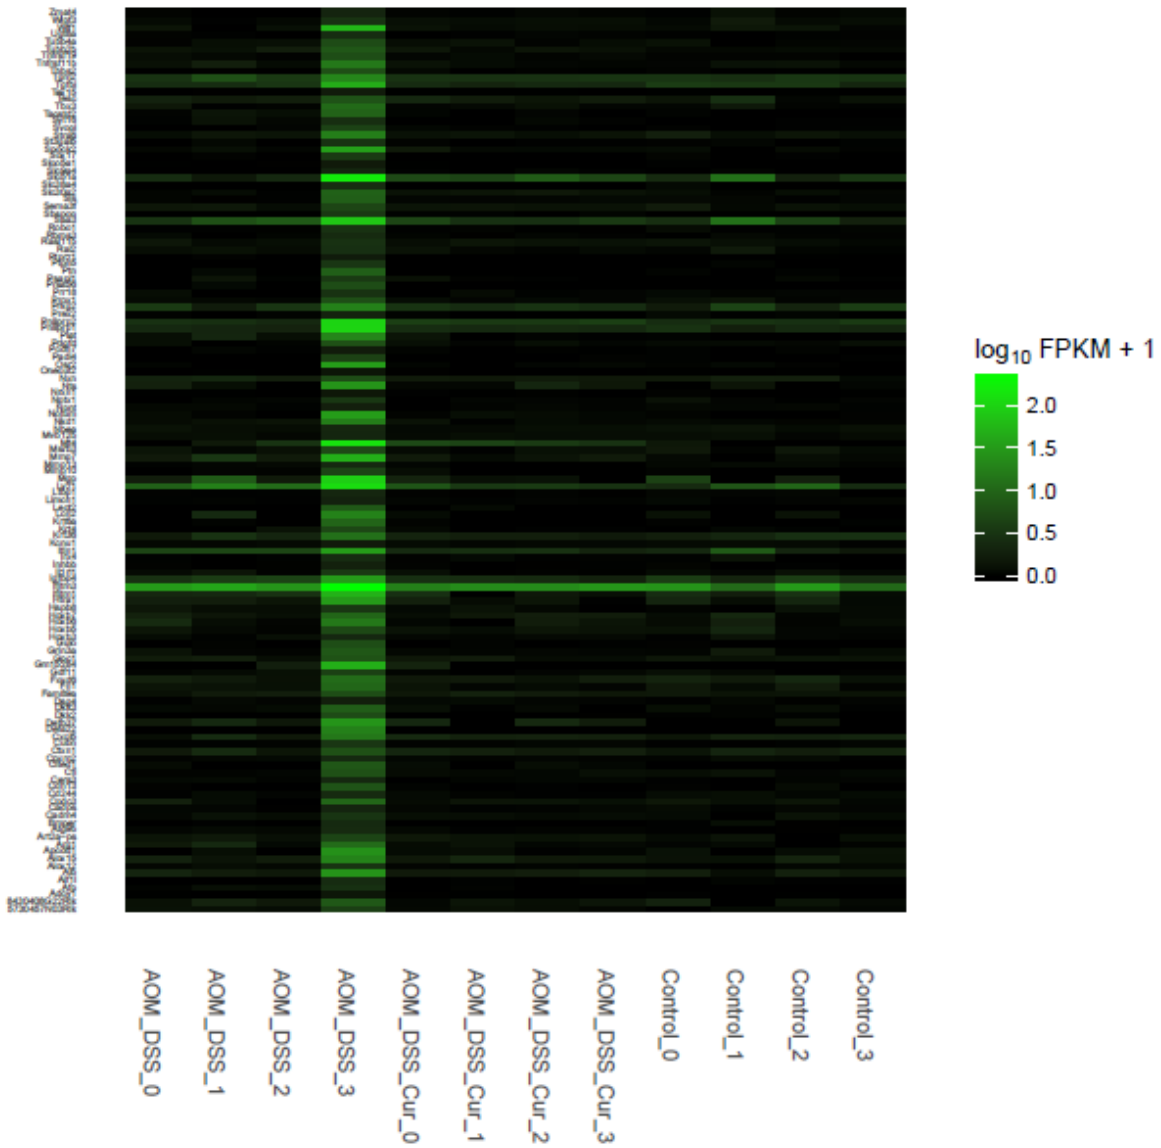

**Figure S1:** The mRNA expression of selected genes in all the three groups. One animal from the AOM+DSS group showed different expression pattern than others. This sample was considered as an outlier and excluded from this study.

**Figure S2**

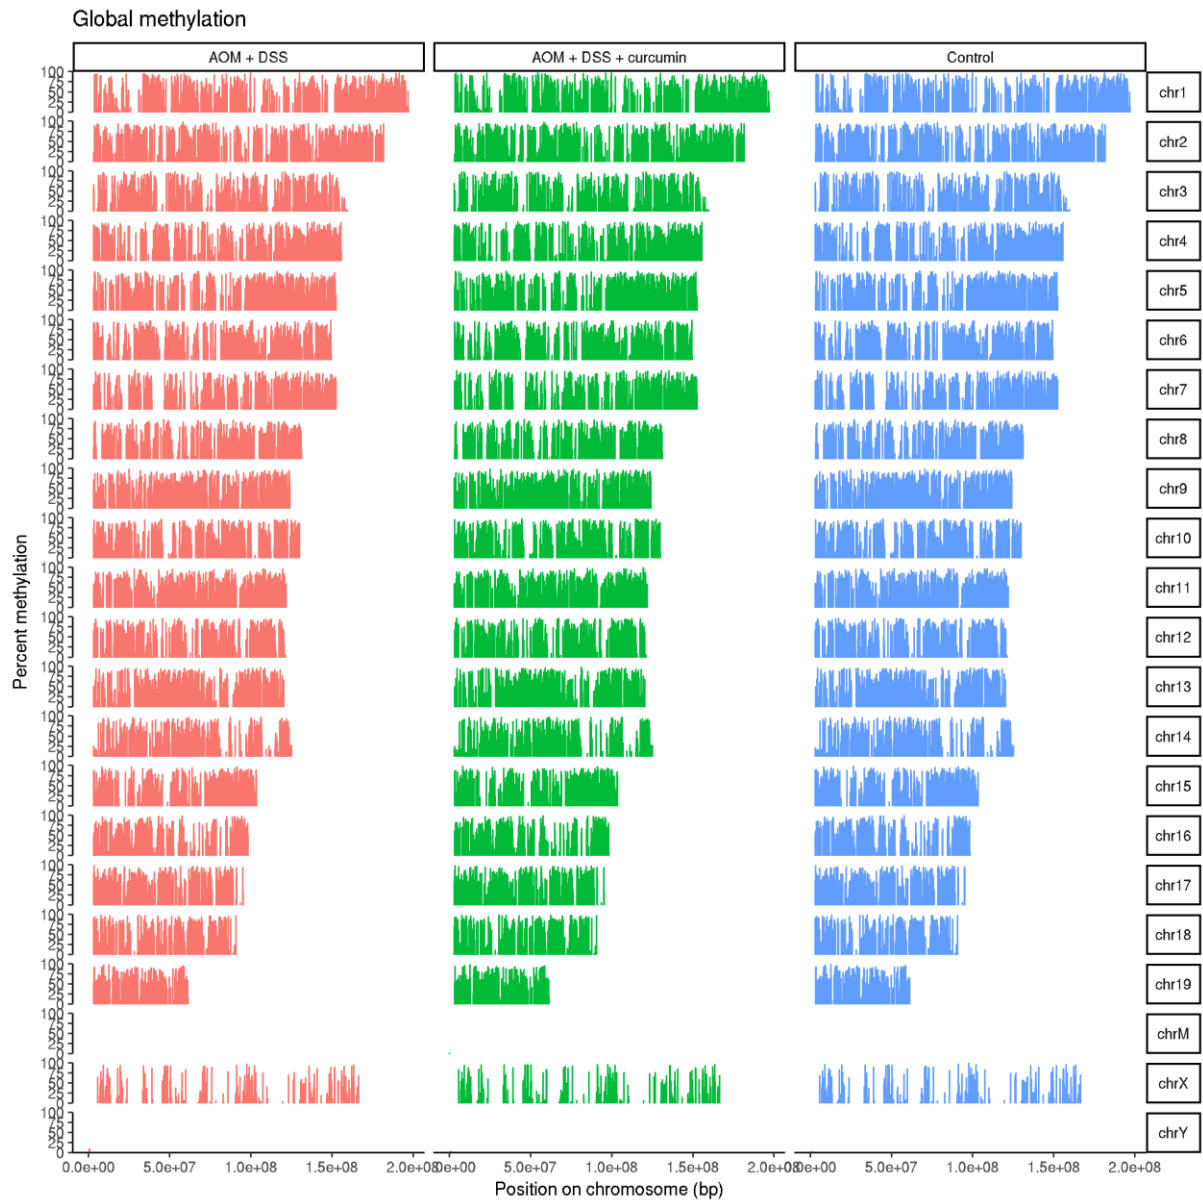

**Figure S2:** Global methylation level in control, AOM+DSS, and AOM+DSS+Curcumin groups.

**Figure S3**

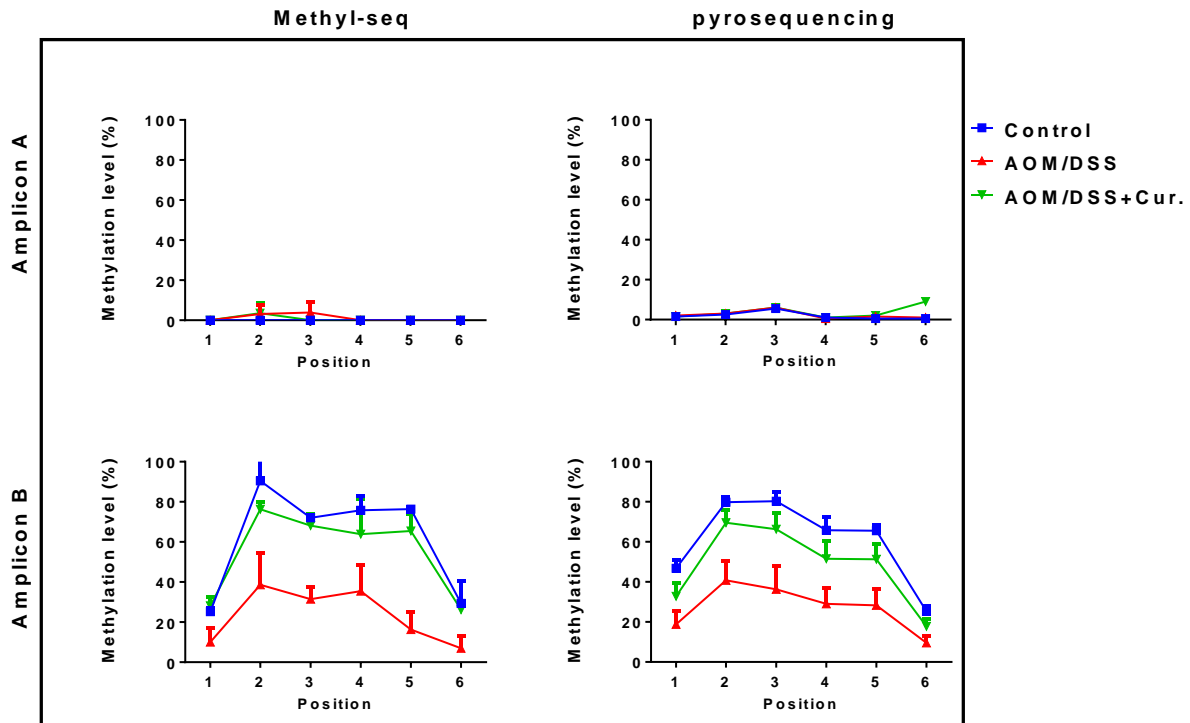

**Figure S3:** Single resolution methylation ratio of Tnf in amplicon A (upper) and B (lower). Each group has 2 replicates for Methyl-seq (left panel) and 3 replicates for pyrosequencing. Data are presented as mean  $\pm$  SD.



Figure S4

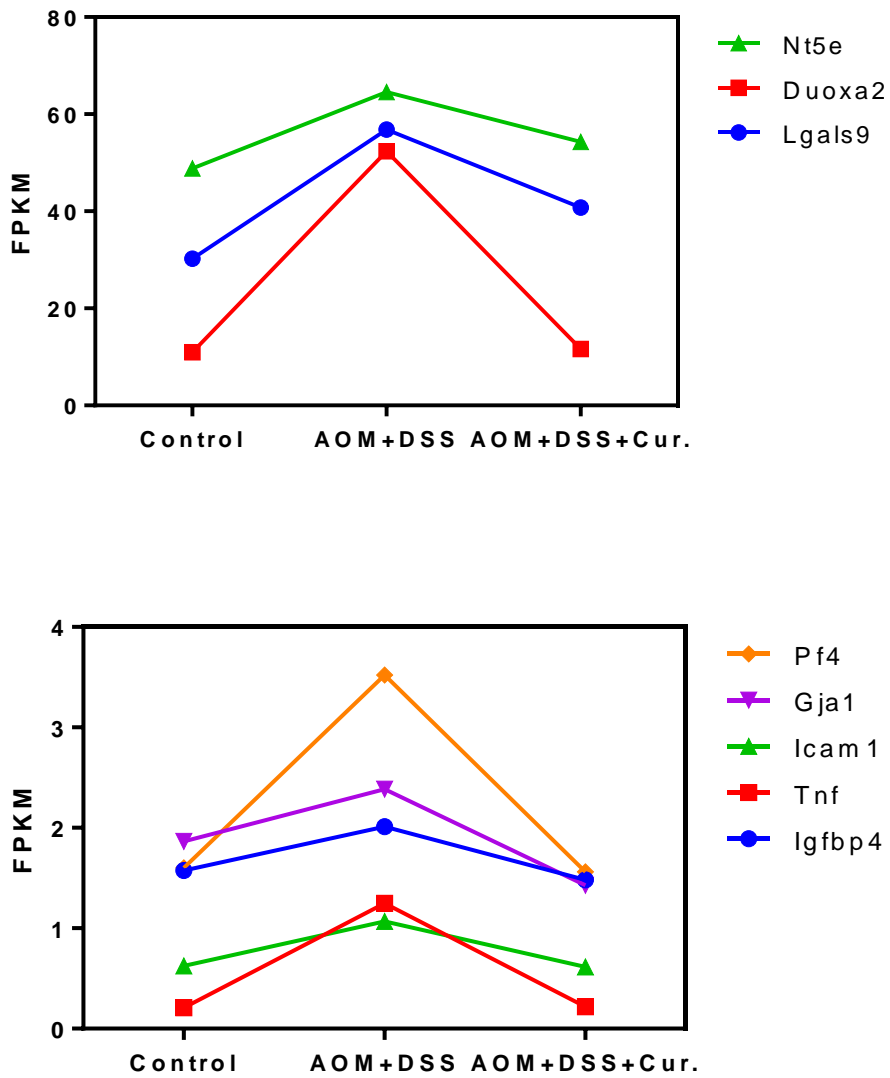

Figure S4: The FPKM value of selected genes from RNA-seq as validated in Figure 5.
